# FOCUS

THE JOURNAL OF LIFELONG LEARNING IN PSYCHIATRY



## *Child and Adolescent Psychiatry*

*Guest Editor, B. Harrison Levine, M.D., M.P.H.*

### IN CLINICAL SYNTHESIS:

Early-Onset Bipolar Disorder

*Stephanie E. Meyer, Ph.D.  
Gabrielle A. Carlson, M.D.*

An Update on Autism

*Alexander Westphal, M.D.  
Fred R. Volkmar, M.D.*

Clinical Use of Telemedicine  
in Child Psychiatry

*Rashelle Hakak, B.A.  
Roxy Szeftel, M.D.*

AND INFLUENTIAL PUBLICATIONS . . .
